# Supplementary material
Source: PubMed Central journal article supplement (PMC4793448)
Supplement: here010061.wt1_default.pdf [file here010061.wt1_default.pdf]

**Supplementary Table 1** Previous cross-referencing studies of myocardial infarction (MI) recording in hospital discharge databases, death registry and other sources

| Author and reference  | Year       | Country   | N sources | Sources compared |             |               |                | N MI patients | What was compared?                                                                                                                                                         | Findings                                                                                                                                                                                            |
|-----------------------|------------|-----------|-----------|------------------|-------------|---------------|----------------|---------------|----------------------------------------------------------------------------------------------------------------------------------------------------------------------------|-----------------------------------------------------------------------------------------------------------------------------------------------------------------------------------------------------|
|                       |            |           |           | Primary care     | MI registry | Hospital data | Death registry |               |                                                                                                                                                                            |                                                                                                                                                                                                     |
| Hammar <sup>60</sup>  | 1975-1981  | Sweden    | 3         | No               | Local       | Yes           | Yes            | 5832          | MI recorded in hospital discharge or mortality data <i>versus</i> MI community register.                                                                                   | 81% of 5832 cases in the community register were found in hospital discharge and mortality data.<br><br>83% of 6582 cases in hospital discharge and mortality were found in the community register. |
| Pietila <sup>61</sup> | 1980-1990  | Finland   | 3         | No               | No          | Yes           | Yes            | 214           | MI recorded in hospital discharge and coronary death recorded in the cause of death registers <i>versus</i> the Helsinki Heart Study.                                      | In 1980-86, 94% of hospital/fatal cases were confirmed and in 1987-90, 92% of hospital/fatal cases were confirmed.                                                                                  |
| Madsen <sup>39</sup>  | 1982-1991  | Denmark   | 3         | No               | Local       | Yes           | Yes            | 6157          | MI recorded in the National Heart Registry <i>versus</i> MI recorded in MONICA Denmark.                                                                                    | 96% of 6157 cases in the National Heart Registry were found in MONICA within 28 days.                                                                                                               |
| Merlo <sup>62</sup>   | 1982-1994  | Sweden    | 3         | No               | No          | Yes           | Yes            | 128           | MI recorded in the National Patient Register <i>versus</i> MI recorded in the County Patient Register <i>versus</i> MI in the National Mortality Register.                 | 128 cases identified: 77% in the National Patient Register, 73% in the County Patient Register, 49% in the Mortality Register.                                                                      |
| Rapola <sup>19</sup>  | 1985-1993  | Finland   | 3         | No               | No          | Yes           | Yes            | 408           | MI and fatal coronary disease in National Hospital Discharge Register and the Register of Causes of Death <i>versus</i> medical record review against WHO MONICA criteria. | 94% of 408 hospital/mortality register cases categorised as definite or possible MI according to WHO criteria.                                                                                      |
| Boyle <sup>38</sup>   | 1986-1991  | Australia | 3         | No               | Local       | Yes           | Yes            | 7117          | MI recorded in hospital and in death certificates <i>versus</i> MI recorded in MONICA Newcastle.                                                                           | 78.9% of hospital cases were confirmed by MONICA Newcastle.<br>96.0% of death certificate MIs were confirmed by MONICA Newcastle.                                                                   |
| Hammar <sup>20</sup>  | 1987, 1995 | Sweden    | 3         | No               | No          | Yes           | Yes            | 713           | MI recorded in hospital <i>versus</i> medical record review against strict diagnostic criteria.                                                                            | 86% of 713 MI cases were classified as definite MI.                                                                                                                                                 |

| Author and reference     | Year      | Country     | Sources compared |              |             |               |                | N MI patients | What was compared?                                                                                                                                        | Findings                                                                                                                                                                                                                                           |
|--------------------------|-----------|-------------|------------------|--------------|-------------|---------------|----------------|---------------|-----------------------------------------------------------------------------------------------------------------------------------------------------------|----------------------------------------------------------------------------------------------------------------------------------------------------------------------------------------------------------------------------------------------------|
|                          |           |             | N sources        | Primary care | MI registry | Hospital data | Death registry |               |                                                                                                                                                           |                                                                                                                                                                                                                                                    |
| Merry <sup>24</sup>      | 1987-1997 | Netherlands | 5                | Yes          | No          | Yes           | Yes            | 413           | MI recorded in hospital discharge versus Cardiology Information System gold standard.                                                                     | 97% of 413 hospitalised cases were found in the Cardiology Information System.                                                                                                                                                                     |
| Pajunen <sup>23</sup>    | 1988-2002 | Finland     | 3                | No           | Local       | Yes           | Yes            | 37 062        | MI recorded in hospital discharge and coronary death recorded in the cause of death registers <i>versus</i> MI recorded in the MONICA study.              | 90% of cases from hospital discharge and cause of death were identified in the MONICA study. Hospital discharge and cause of death registries identified 83% of MONICA MIs.                                                                        |
| WOSCOPS <sup>1</sup>     | 1989-1991 | Scotland    | 2                | No           | No          | Yes           | Yes            | 1109          | Hospitalised MI identified in active follow-up in WOSCOPS trial (pravastatin for primary prevention) <i>versus</i> in the Scottish Record Linkage System. | 94% of 1109 hospitalisations with myocardial infarction identified in active follow-up were identified in the Record Linkage System.<br><br>78% of 1330 hospitalisations with MI in the Record Linkage System were identified in active follow-up. |
| Wright <sup>22</sup>     | 1997-2005 | England     | 3                | Yes          | No          | Yes           | Yes            | 130           | Hospital discharge MI diagnosis <i>versus</i> general practitioner questionnaire.                                                                         | 89.2% of 130 hospital discharge MIs had a diagnosis of MI in general practice.                                                                                                                                                                     |
| Barchielli <sup>21</sup> | 2003      | Italy       | 3                | No           | No          | Yes           | Yes            | 372           | Hospital discharge MI diagnosis <i>versus</i> medical record review.                                                                                      | 86.0% of 372 cases had definite MI according to American Heart Association criteria, and 52.7% according to MONICA criteria.                                                                                                                       |
| Current study            | 2001-2009 | England     | 4                | Yes          | National    | Yes           | Yes            | 21 489        | Hospital discharge MI <i>versus</i> primary care MI <i>versus</i> acute coronary syndrome registry MI <i>versus</i> death registry MI.                    | 30% of non-fatal cases were captured by three sources.                                                                                                                                                                                             |

Abbreviations: MI, myocardial infarction; MONICA, Multinational MONItoring of trends and determinants in CARDiovascular disease; WHO, World Health Organisation; WOSCOPS, West of Scotland Coronary Prevention Study

## References

1. The West of Scotland Coronary Prevention Study Group. Computerised record linkage: compared with traditional patient follow-up methods in clinical trials and illustrated in a prospective epidemiological study. *J Clin Epidemiol.* 1995;48(12):1441-1452.
19. Rapola JM, Virtamo J, Korhonen P, Haapakoski J, Hartman AM, Edwards BK, et al. Validity of diagnoses of major coronary events in national registers of hospital diagnoses and deaths in Finland. *Eur J Epidemiol.* 1997;13:133-138
20. Hammar N, Alfredsson L, Rosén M, Spetz CL, Kahan T, Ysberg AS. A national record linkage to study acute myocardial infarction incidence and case fatality in Sweden. *Int J Epidemiol.* 2001;30(Suppl 1):S30-S34
21. Barchielli A, Balzi D, Naldoni P, Roberts AT, Profili F, Dima F, Palmieri L. Hospital discharge data for assessing myocardial infarction events and trends, and effects of diagnosis validation according to MONICA and AHA criteria. *J Epidemiol Community Health.* 2012;66(5):462-467
22. Wright FL, Green J, Canoy D, Cairns BJ, Balkwill A, Beral V, Million Women Study Collaborators. Vascular disease in women: comparison of diagnoses in hospital episode statistics and general practice records in England. *BMC Med Res Methodol.* 2012;12(1):161
23. Pajunen P, Koukkunen H, Ketonen M, Jerkkola T, Immonen-Räihä P, Kärjä-Koskenkari P, et al. The validity of the Finnish Hospital Discharge Register and Causes of Death Register data on coronary heart disease. *Eur J Cardiovasc Prev Rehabil.* 2005;12(2):132-137
24. Merry, AHH, Boer JMA, Schouten LJ, Feskens EJM, Verschuren WMM, Gorgels, APM, et al. Validity of coronary heart diseases and heart failure based on hospital discharge and mortality data in the Netherlands using the cardiovascular registry Maastricht cohort study. *Eur J Epidemiol.* 2009;24(5):237-247
38. Boyle CA, Dobson AJ. The accuracy of hospital records and death certificates for acute myocardial infarction. *Aust N Z J Med.* 1995;25(4):316-323
39. Madsen M, Davidsen M, Rasmussen S, Abildstrom SZ, Osler M. The validity of the diagnosis of acute myocardial infarction in routine statistics: a comparison of mortality and hospital discharge data with the Danish MONICA registry. *J Clin Epidemiol.* 2003;56(2):124-130
60. Hammar N, Nerbrand C, Ahlmark G, Tibblin G, Tsipogianni A, Johansson S, et al. Identification of cases of myocardial infarction: hospital discharge data and mortality data compared to myocardial infarction community registers. *Int J Epidemiol.* 1991;20(1):114-20
61. Pietilä K, Tenkanen L, Mänttari M, Manninen V. How to define coronary heart disease in register-based follow-up studies: experience from the Helsinki Heart Study. *Ann Med.* 1997;29(3):253-259
62. Merlo J, Lindblad U, Pessah-Rasmussen H, Hedblad B, Rastam J, Isacson SO, et al. Comparison of different procedures to identify probable cases of myocardial infarction and stroke in two Swedish prospective cohort studies using local and national routine registers. *Eur J Epidemiol.* 2000;16(3):235-243
