# Supplementary material
Source: PubMed Central journal article supplement (PMC4793448)
Supplement: here010061.wt2_default.pdf [file here010061.wt2_default.pdf]

**Supplementary Table 2** Purpose of recording of myocardial infarction and possible reasons for incompleteness in the four linked data sources

|                                    | <b>Primary care:<br/>CPRD</b>                                                                              | <b>Hospital<br/>admissions: HES</b>                                                                                                         | <b>Disease registry:<br/>MINAP</b>                                                                                                       | <b>Cause specific<br/>mortality: ONS</b>                                                                                 |
|------------------------------------|------------------------------------------------------------------------------------------------------------|---------------------------------------------------------------------------------------------------------------------------------------------|------------------------------------------------------------------------------------------------------------------------------------------|--------------------------------------------------------------------------------------------------------------------------|
| Purpose of recording               | Clinical care, electronic health record                                                                    | Administration                                                                                                                              | Quality and outcomes improvement                                                                                                         | Public health and administrative                                                                                         |
| Nature of coding                   | Read codes                                                                                                 | ICD-10 codes I21, I22, I23 as the primary diagnosis                                                                                         | Custom coding of discharge diagnosis, ECG findings, cardiac markers and other clinical information                                       | ICD-10 codes I21, I22, I23 as the underlying cause of death                                                              |
| When are data coded?               | Real time for consultations                                                                                | Weeks after discharge                                                                                                                       | Days to weeks after admission                                                                                                            | Days after death                                                                                                         |
| Who codes data?                    | GP during consultation, administrator for hospital discharge letters                                       | Non-clinical trained coders, ideally based on review of complete hospital notes, but frequently based only on discharge summaries           | Audit nurse                                                                                                                              | GP or hospital doctor completes death certificate with cause of death. ICD-10 codes added by trained non-clinical coders |
| Possible reasons for non-recording | GP did not receive hospital letter or death notification, myocardial infarction recorded in free text only | Patient admitted abroad or to private hospital, diagnosis may not be clear in the notes, linkage failure if NHS number incorrectly recorded | Patient not admitted to NHS cardiology ward or not under the care of cardiology team, linkage failure if NHS number incorrectly recorded | Patient died abroad, linkage failure if address or date of birth incorrect                                               |

Abbreviations: CPRD, Clinical Practice Research Datalink; GP, general practitioner; HES, Hospital Episode Statistics; ICD-10, International Classification of Diseases, 10th revision; MINAP, Myocardial Ischaemia National Audit Project; NHS, National Health Service; ONS, Office for National Statistics
