# Supplementary material
Source: PubMed Central journal article supplement (PMC4793448)
Supplement: here010061.wt3_default.pdf [file here010061.wt3_default.pdf]

**Supplementary Table 3** Read codes used to identify acute myocardial infarction in primary care records (Clinical Practice Research Datalink).

| Read code | Read term                                                  |
|-----------|------------------------------------------------------------|
| 323 . .00 | ECG: myocardial infarction                                 |
| 3233 .00  | ECG: antero-septal infarct.                                |
| 3234 .00  | ECG:posterior/inferior infarct                             |
| 3235 .00  | ECG: subendocardial infarct                                |
| 3236 .00  | ECG: lateral infarction                                    |
| 323Z .00  | ECG: myocardial infarct NOS                                |
| 889A .00  | Diab mellit insulin-glucose infus acute myocardial infarct |
| G30 . .00 | Acute myocardial infarction                                |
| G30 . .11 | Attack - heart                                             |
| G30 . .12 | Coronary thrombosis                                        |
| G30 . .13 | Cardiac rupture following myocardial infarction (MI)       |
| G30 . .14 | Heart attack                                               |
| G30 . .15 | MI - acute myocardial infarction                           |
| G30 . .16 | Thrombosis - coronary                                      |
| G30 . .17 | Silent myocardial infarction                               |
| G300 .00  | Acute anterolateral infarction                             |
| G301 .00  | Other specified anterior myocardial infarction             |
| G301000   | Acute anteroapical infarction                              |
| G301100   | Acute anteroseptal infarction                              |
| G301z00   | Anterior myocardial infarction NOS                         |
| G302 .00  | Acute inferolateral infarction                             |
| G303 .00  | Acute inferoposterior infarction                           |
| G304 .00  | Posterior myocardial infarction NOS                        |
| G305 .00  | Lateral myocardial infarction NOS                          |
| G306 .00  | True posterior myocardial infarction                       |
| G307 .00  | Acute subendocardial infarction                            |
| G307000   | Acute non-Q wave infarction                                |
| G307100   | Acute non-ST segment elevation myocardial infarction       |
| G308 .00  | Inferior myocardial infarction NOS                         |
| G309 .00  | Acute Q-wave infarct                                       |
| G30A .00  | Mural thrombosis                                           |
| G30B .00  | Acute posterolateral myocardial infarction                 |
| G30X .00  | Acute transmural myocardial infarction of unspecif site    |
| G30X000   | Acute ST segment elevation myocardial infarction           |
| G30y .00  | Other acute myocardial infarction                          |

| Read code | Read term                                                    |
|-----------|--------------------------------------------------------------|
| G30y000   | Acute atrial infarction                                      |
| G30y100   | Acute papillary muscle infarction                            |
| G30y200   | Acute septal infarction                                      |
| G30yz00   | Other acute myocardial infarction NOS                        |
| G30z.00   | Acute myocardial infarction NOS                              |
| G310.11   | Dressler's syndrome                                          |
| G31y100   | Microinfarction of heart                                     |
| G35..00   | Subsequent myocardial infarction                             |
| G350.00   | Subsequent myocardial infarction of anterior wall            |
| G351.00   | Subsequent myocardial infarction of inferior wall            |
| G353.00   | Subsequent myocardial infarction of other sites              |
| G35X.00   | Subsequent myocardial infarction of unspecified site         |
| G36..00   | Certain current complication follow acute myocardial infarct |
| G360.00   | Haemopericardium/current comp folow acut myocard infarct     |
| G361.00   | Atrial septal defect/curr comp folow acut myocardal infarct  |
| G362.00   | Ventric septal defect/curr comp fol acut myocardal infarctn  |
| G363.00   | Ruptur cardiac wall w/out haemopericard/cur comp fol ac MI   |
| G364.00   | Ruptur chordae tendinae/curr comp fol acute myocard infarct  |
| G365.00   | Rupture papillary muscle/curr comp fol acute myocard infarct |
| G366.00   | Thrombosis atrium,auric append&vent/curr comp foll acute MI  |
| G38..00   | Postoperative myocardial infarction                          |
| G380.00   | Postoperative transmural myocardial infarction anterior wall |
| G381.00   | Postoperative transmural myocardial infarction inferior wall |
| G384.00   | Postoperative subendocardial myocardial infarction           |
| G38z.00   | Postoperative myocardial infarction, unspecified             |
| G501.00   | Post infarction pericarditis                                 |
| Gyu3400   | [X]Acute transmural myocardial infarction of unspecif site   |
