# Supplementary material
Source: PubMed Central journal article supplement (PMC4793448)
Supplement: here010061.wt4_default.pdf [file here010061.wt4_default.pdf]

**Supplementary Table 4** Incidence of fatal and non-fatal myocardial infarction in 2003-2009 by age group and sex, and by Government Office Region.

Data sources: CPRD - primary care, HES - hospital admissions, MINAP - acute coronary syndrome registry, ONS - death registry

**Incidence of myocardial infarction by age group, sex and year**

Rates per 100 000 population aged over 18, standardised to the European standard population (95% confidence interval)

**Myocardial infarction incidence for men aged 75 or over**

| Sources                  | 2003           | 2004           | 2005           | 2006           | 2007           | 2008           | 2009           |
|--------------------------|----------------|----------------|----------------|----------------|----------------|----------------|----------------|
| 1: CPRD                  | 626 (557, 701) | 620 (552, 694) | 496 (438, 559) | 482 (426, 543) | 493 (438, 553) | 367 (321, 418) | 326 (245, 427) |
| 1: HES                   | 476 (417, 542) | 505 (444, 573) | 457 (401, 518) | 385 (335, 440) | 401 (352, 455) | 300 (259, 346) | 280 (205, 375) |
| 1: MINAP                 | 288 (242, 340) | 354 (303, 411) | 318 (271, 369) | 309 (265, 358) | 329 (285, 379) | 323 (280, 371) | 241 (172, 329) |
| 1: ONS                   | 121 (92, 157)  | 174 (139, 215) | 132 (103, 167) | 158 (126, 195) | 123 (96, 155)  | 102 (78, 131)  | 156 (102, 230) |
| 2: HES, ONS              | 598 (531, 672) | 522 (460, 590) | 520 (461, 586) | 456 (402, 516) | 458 (405, 516) | 356 (311, 407) | 392 (302, 502) |
| 3: CPRD, MINAP, HES      | 869 (787, 956) | 772 (696, 853) | 665 (598, 738) | 528 (470, 592) | 542 (484, 605) | 535 (479, 596) | 460 (362, 578) |
| 4: CPRD, MINAP, HES, ONS | 892 (810, 981) | 743 (669, 824) | 606 (542, 676) | 660 (595, 731) | 578 (518, 643) | 592 (533, 656) | 524 (419, 648) |

**Myocardial infarction incidence for women aged 75 or over**

| Sources                  | 2003           | 2004           | 2005           | 2006           | 2007           | 2008           | 2009           |
|--------------------------|----------------|----------------|----------------|----------------|----------------|----------------|----------------|
| 1: CPRD                  | 447 (406, 491) | 362 (325, 403) | 338 (303, 377) | 315 (281, 351) | 320 (287, 357) | 275 (245, 309) | 278 (218, 352) |
| 1: HES                   | 325 (290, 364) | 322 (288, 360) | 296 (262, 333) | 276 (245, 311) | 245 (216, 278) | 244 (216, 276) | 218 (165, 284) |
| 1: MINAP                 | 212 (183, 244) | 246 (215, 279) | 174 (150, 202) | 202 (175, 232) | 217 (189, 248) | 209 (182, 240) | 216 (165, 281) |
| 1: ONS                   | 120 (99, 145)  | 82 (65, 103)   | 92 (75, 113)   | 72 (56, 91)    | 69 (54, 87)    | 53 (40, 69)    | 80 (50, 125)   |
| 2: HES, ONS              | 359 (323, 400) | 387 (348, 429) | 326 (292, 364) | 303 (270, 339) | 296 (264, 332) | 279 (248, 313) | 301 (239, 377) |
| 3: CPRD, MINAP, HES      | 542 (497, 591) | 477 (435, 523) | 393 (355, 434) | 430 (390, 473) | 391 (354, 431) | 356 (321, 394) | 396 (323, 483) |
| 4: CPRD, MINAP, HES, ONS | 553 (507, 602) | 515 (471, 563) | 406 (368, 448) | 413 (375, 456) | 414 (376, 455) | 335 (301, 373) | 439 (362, 531) |

## Myocardial infarction incidence for men aged under 75

| Sources                  | 2003           | 2004           | 2005           | 2006           | 2007           | 2008           | 2009           |
|--------------------------|----------------|----------------|----------------|----------------|----------------|----------------|----------------|
| 1: CPRD                  | 158 (148, 169) | 147 (138, 158) | 140 (131, 150) | 125 (116, 134) | 119 (111, 128) | 109 (101, 117) | 123 (107, 142) |
| 1: HES                   | 117 (108, 127) | 117 (108, 126) | 115 (106, 124) | 102 (95, 110)  | 101 (94, 109)  | 99 (92, 107)   | 111 (95, 129)  |
| 1: MINAP                 | 65 (58, 72)    | 82 (74, 90)    | 83 (76, 91)    | 82 (75, 90)    | 86 (79, 93)    | 80 (74, 87)    | 86 (74, 101)   |
| 1: ONS                   | 37 (32, 43)    | 39 (34, 45)    | 30 (26, 35)    | 29 (25, 33)    | 24 (21, 29)    | 24 (21, 28)    | 30 (23, 40)    |
| 2: HES, ONS              | 145 (135, 156) | 138 (128, 148) | 125 (116, 135) | 118 (110, 127) | 118 (110, 127) | 108 (100, 116) | 123 (106, 141) |
| 3: CPRD, MINAP, HES      | 207 (195, 220) | 192 (181, 204) | 181 (170, 193) | 167 (157, 177) | 165 (155, 175) | 146 (137, 155) | 168 (149, 190) |
| 4: CPRD, MINAP, HES, ONS | 216 (204, 229) | 203 (192, 216) | 192 (181, 203) | 170 (160, 180) | 161 (151, 171) | 146 (137, 155) | 155 (137, 175) |

## Myocardial infarction incidence for women aged under 75

| Sources                  | 2003           | 2004           | 2005           | 2006           | 2007           | 2008           | 2009           |
|--------------------------|----------------|----------------|----------------|----------------|----------------|----------------|----------------|
| 1: CPRD                  | 175 (163, 187) | 164 (153, 176) | 138 (128, 148) | 135 (125, 145) | 125 (117, 135) | 115 (106, 123) | 117 (101, 136) |
| 1: HES                   | 137 (126, 148) | 128 (118, 139) | 116 (107, 126) | 120 (111, 130) | 115 (106, 124) | 97 (90, 106)   | 101 (86, 119)  |
| 1: MINAP                 | 81 (73, 90)    | 99 (91, 109)   | 85 (77, 94)    | 91 (83, 99)    | 89 (82, 97)    | 89 (82, 97)    | 86 (72, 103)   |
| 1: ONS                   | 35 (30, 41)    | 40 (34, 46)    | 35 (30, 40)    | 32 (28, 37)    | 31 (27, 36)    | 32 (27, 37)    | 28 (20, 38)    |
| 2: HES, ONS              | 148 (137, 160) | 151 (140, 162) | 140 (130, 150) | 140 (130, 150) | 124 (115, 134) | 112 (104, 121) | 110 (95, 128)  |
| 3: CPRD, MINAP, HES      | 214 (201, 228) | 211 (198, 225) | 188 (176, 201) | 184 (173, 196) | 166 (156, 177) | 154 (144, 164) | 148 (131, 169) |
| 4: CPRD, MINAP, HES, ONS | 227 (214, 242) | 214 (201, 228) | 187 (175, 199) | 182 (171, 193) | 172 (161, 183) | 163 (153, 173) | 173 (152, 196) |

## Incidence of myocardial infarction by region and year

Rates per 100 000 population aged over 18, standardised to the European standard population (95% confidence interval)

### 1. North East

| Sources                  | 2003           | 2004           | 2005           | 2006           | 2007           | 2008           | 2009           |
|--------------------------|----------------|----------------|----------------|----------------|----------------|----------------|----------------|
| 1: CPRD                  | 253 (171, 385) | 257 (164, 410) | 302 (202, 463) | 208 (131, 337) | 213 (130, 348) | 136 (83, 239)  | 311 (131, 761) |
| 1: HES                   | 205 (134, 326) | 243 (158, 386) | 153 (94, 277)  | 208 (126, 346) | 248 (155, 392) | 133 (68, 254)  | 221 (54, 693)  |
| 1: MINAP                 | 144 (76, 268)  | 140 (80, 261)  | 107 (62, 219)  | 85 (37, 195)   | 196 (125, 316) | 188 (108, 321) | 95 (25, 473)   |
| 1: ONS                   | 15 (3, 98)     | 68 (32, 172)   | 93 (34, 228)   | 55 (23, 149)   | 50 (13, 149)   | 87 (38, 194)   | 116 (6, 578)   |
| 2: HES, ONS              | 257 (174, 391) | 199 (120, 339) | 239 (134, 413) | 186 (110, 318) | 286 (188, 434) | 195 (126, 313) | 176 (71, 562)  |
| 3: CPRD, MINAP, HES      | 357 (256, 506) | 329 (228, 487) | 188 (121, 318) | 321 (226, 466) | 318 (215, 472) | 290 (191, 441) | 346 (171, 779) |
| 4: CPRD, MINAP, HES, ONS | 293 (203, 432) | 409 (284, 592) | 394 (283, 562) | 226 (156, 346) | 284 (184, 436) | 314 (216, 461) | 328 (112, 834) |

## 2. North West

| Sources                  | 2003           | 2004           | 2005           | 2006           | 2007           | 2008           | 2009           |
|--------------------------|----------------|----------------|----------------|----------------|----------------|----------------|----------------|
| 1: CPRD                  | 192 (173, 213) | 178 (161, 197) | 170 (152, 190) | 152 (137, 170) | 145 (130, 162) | 138 (124, 154) | 135 (109, 170) |
| 1: HES                   | 146 (130, 165) | 139 (124, 157) | 135 (120, 152) | 134 (119, 150) | 125 (111, 141) | 113 (100, 128) | 139 (111, 176) |
| 1: MINAP                 | 84 (72, 98)    | 108 (94, 124)  | 94 (82, 107)   | 93 (81, 108)   | 110 (97, 125)  | 108 (95, 123)  | 90 (68, 119)   |
| 1: ONS                   | 40 (32, 50)    | 50 (40, 62)    | 33 (26, 42)    | 43 (35, 53)    | 29 (22, 37)    | 39 (32, 48)    | 31 (19, 51)    |
| 2: HES, ONS              | 170 (152, 190) | 177 (159, 197) | 161 (145, 180) | 147 (132, 163) | 143 (128, 160) | 128 (114, 143) | 132 (104, 168) |
| 3: CPRD, MINAP, HES      | 260 (238, 284) | 234 (213, 257) | 219 (200, 241) | 197 (179, 217) | 202 (184, 222) | 173 (157, 191) | 186 (151, 228) |
| 4: CPRD, MINAP, HES, ONS | 274 (251, 299) | 248 (227, 272) | 220 (200, 242) | 197 (179, 216) | 194 (176, 214) | 187 (170, 205) | 196 (161, 239) |

## 3. Yorkshire

| Sources                  | 2003           | 2004           | 2005           | 2006           | 2007           | 2008           | 2009           |
|--------------------------|----------------|----------------|----------------|----------------|----------------|----------------|----------------|
| 1: CPRD                  | 165 (134, 207) | 185 (150, 229) | 167 (138, 203) | 137 (110, 171) | 136 (110, 171) | 118 (95, 148)  | 148 (97, 229)  |
| 1: HES                   | 128 (101, 165) | 166 (132, 210) | 107 (83, 138)  | 122 (97, 154)  | 126 (100, 160) | 114 (89, 146)  | 120 (77, 193)  |
| 1: MINAP                 | 72 (51, 104)   | 113 (86, 149)  | 103 (80, 133)  | 98 (76, 129)   | 91 (69, 121)   | 86 (67, 113)   | 78 (47, 139)   |
| 1: ONS                   | 53 (35, 81)    | 38 (22, 64)    | 37 (24, 58)    | 35 (22, 56)    | 34 (22, 55)    | 24 (13, 44)    | 48 (20, 112)   |
| 2: HES, ONS              | 179 (147, 220) | 192 (154, 238) | 132 (105, 167) | 152 (122, 190) | 122 (97, 154)  | 110 (88, 138)  | 151 (97, 237)  |
| 3: CPRD, MINAP, HES      | 231 (191, 281) | 219 (183, 263) | 186 (152, 228) | 180 (151, 216) | 203 (170, 243) | 171 (142, 206) | 236 (167, 336) |
| 4: CPRD, MINAP, HES, ONS | 241 (203, 287) | 247 (207, 296) | 223 (185, 270) | 185 (154, 223) | 180 (151, 216) | 162 (135, 196) | 180 (121, 270) |

## 4. East Midlands

| Sources                  | 2003           | 2004           | 2005           | 2006           | 2007           | 2008           | 2009           |
|--------------------------|----------------|----------------|----------------|----------------|----------------|----------------|----------------|
| 1: CPRD                  | 142 (108, 188) | 164 (129, 210) | 160 (127, 204) | 124 (96, 162)  | 137 (109, 174) | 136 (107, 173) | 124 (69, 221)  |
| 1: HES                   | 151 (117, 198) | 141 (107, 187) | 115 (88, 152)  | 104 (81, 138)  | 99 (74, 133)   | 126 (97, 164)  | 63 (25, 147)   |
| 1: MINAP                 | 57 (39, 87)    | 101 (76, 137)  | 72 (52, 102)   | 94 (70, 128)   | 95 (71, 129)   | 94 (69, 128)   | 102 (55, 191)  |
| 1: ONS                   | 43 (27, 72)    | 37 (21, 66)    | 38 (25, 62)    | 22 (12, 43)    | 26 (16, 46)    | 28 (16, 48)    | 6 (1, 67)      |
| 2: HES, ONS              | 171 (131, 223) | 162 (128, 208) | 123 (96, 161)  | 143 (112, 183) | 109 (83, 144)  | 126 (99, 162)  | 101 (53, 192)  |
| 3: CPRD, MINAP, HES      | 238 (193, 294) | 199 (160, 249) | 183 (149, 227) | 188 (152, 234) | 171 (138, 215) | 184 (149, 227) | 161 (100, 260) |
| 4: CPRD, MINAP, HES, ONS | 251 (205, 308) | 215 (175, 266) | 194 (157, 241) | 200 (163, 247) | 153 (123, 192) | 145 (116, 182) | 200 (134, 305) |

## 5. West Midlands

| Sources                  | 2003           | 2004           | 2005           | 2006           | 2007           | 2008           | 2009           |
|--------------------------|----------------|----------------|----------------|----------------|----------------|----------------|----------------|
| 1: CPRD                  | 166 (146, 188) | 154 (136, 175) | 119 (104, 138) | 123 (108, 140) | 116 (102, 133) | 105 (91, 122)  | 135 (104, 177) |
| 1: HES                   | 135 (117, 156) | 108 (92, 126)  | 119 (103, 137) | 103 (89, 120)  | 102 (88, 118)  | 84 (72, 99)    | 113 (86, 151)  |
| 1: MINAP                 | 76 (63, 93)    | 92 (78, 109)   | 85 (71, 102)   | 72 (60, 87)    | 72 (61, 86)    | 79 (68, 93)    | 86 (63, 118)   |
| 1: ONS                   | 36 (27, 49)    | 46 (36, 60)    | 33 (26, 44)    | 22 (16, 31)    | 26 (19, 36)    | 24 (17, 34)    | 39 (25, 64)    |
| 2: HES, ONS              | 155 (134, 178) | 138 (120, 159) | 119 (104, 136) | 127 (110, 147) | 122 (108, 140) | 105 (91, 120)  | 106 (77, 147)  |
| 3: CPRD, MINAP, HES      | 215 (193, 240) | 174 (155, 197) | 191 (169, 215) | 172 (153, 194) | 145 (128, 164) | 138 (123, 156) | 137 (109, 176) |
| 4: CPRD, MINAP, HES, ONS | 217 (194, 244) | 195 (174, 218) | 176 (157, 197) | 169 (151, 190) | 165 (148, 185) | 140 (124, 158) | 132 (100, 175) |

## 6. East of England

| Sources                  | 2003           | 2004           | 2005           | 2006           | 2007           | 2008           | 2009           |
|--------------------------|----------------|----------------|----------------|----------------|----------------|----------------|----------------|
| 1: CPRD                  | 147 (129, 168) | 146 (127, 167) | 106 (91, 124)  | 106 (91, 124)  | 107 (92, 124)  | 98 (84, 114)   | 96 (73, 129)   |
| 1: HES                   | 125 (107, 147) | 116 (100, 136) | 104 (89, 122)  | 87 (74, 104)   | 93 (80, 109)   | 78 (66, 92)    | 86 (63, 121)   |
| 1: MINAP                 | 59 (47, 74)    | 90 (75, 108)   | 74 (61, 90)    | 69 (57, 83)    | 74 (63, 88)    | 76 (64, 90)    | 76 (53, 110)   |
| 1: ONS                   | 33 (25, 45)    | 34 (26, 46)    | 28 (21, 39)    | 26 (19, 36)    | 25 (18, 35)    | 17 (12, 25)    | 21 (11, 42)    |
| 2: HES, ONS              | 120 (103, 140) | 123 (105, 144) | 108 (94, 125)  | 112 (98, 129)  | 99 (86, 115)   | 101 (88, 117)  | 93 (70, 126)   |
| 3: CPRD, MINAP, HES      | 179 (158, 204) | 176 (155, 200) | 155 (136, 176) | 133 (117, 152) | 148 (131, 167) | 134 (119, 152) | 118 (90, 156)  |
| 4: CPRD, MINAP, HES, ONS | 186 (165, 211) | 179 (159, 203) | 149 (131, 170) | 162 (144, 183) | 151 (134, 171) | 113 (99, 129)  | 140 (108, 181) |

## 7. South West

| Sources                  | 2003           | 2004           | 2005           | 2006           | 2007           | 2008           | 2009           |
|--------------------------|----------------|----------------|----------------|----------------|----------------|----------------|----------------|
| 1: CPRD                  | 214 (190, 242) | 201 (178, 228) | 157 (139, 179) | 171 (152, 193) | 155 (137, 176) | 138 (121, 157) | 152 (117, 198) |
| 1: HES                   | 152 (131, 176) | 154 (135, 176) | 152 (132, 174) | 149 (130, 170) | 125 (109, 144) | 127 (110, 146) | 113 (84, 152)  |
| 1: MINAP                 | 104 (88, 124)  | 91 (77, 109)   | 110 (93, 129)  | 115 (99, 135)  | 107 (91, 125)  | 116 (101, 134) | 119 (88, 162)  |
| 1: ONS                   | 46 (36, 61)    | 50 (38, 65)    | 40 (30, 52)    | 41 (32, 53)    | 37 (29, 48)    | 33 (25, 44)    | 31 (16, 58)    |
| 2: HES, ONS              | 190 (168, 216) | 184 (162, 209) | 168 (147, 192) | 151 (133, 172) | 156 (137, 177) | 147 (130, 168) | 138 (105, 180) |
| 3: CPRD, MINAP, HES      | 256 (230, 286) | 275 (249, 305) | 233 (209, 260) | 203 (181, 227) | 190 (170, 212) | 193 (172, 215) | 225 (183, 276) |
| 4: CPRD, MINAP, HES, ONS | 269 (242, 300) | 276 (249, 306) | 226 (203, 252) | 227 (204, 252) | 195 (174, 218) | 206 (185, 229) | 187 (151, 234) |

## 8. South Central

| Sources                  | 2003           | 2004           | 2005           | 2006           | 2007           | 2008           | 2009           |
|--------------------------|----------------|----------------|----------------|----------------|----------------|----------------|----------------|
| 1: CPRD                  | 161 (140, 185) | 139 (121, 160) | 124 (107, 143) | 112 (96, 130)  | 103 (89, 119)  | 93 (80, 108)   | 106 (80, 142)  |
| 1: HES                   | 118 (101, 138) | 103 (89, 121)  | 110 (94, 129)  | 82 (69, 98)    | 107 (93, 125)  | 82 (70, 97)    | 72 (49, 106)   |
| 1: MINAP                 | 79 (64, 97)    | 77 (63, 94)    | 68 (57, 83)    | 69 (57, 84)    | 91 (76, 108)   | 77 (65, 91)    | 84 (61, 118)   |
| 1: ONS                   | 32 (23, 44)    | 32 (23, 44)    | 36 (27, 48)    | 29 (22, 40)    | 25 (19, 35)    | 22 (16, 32)    | 17 (8, 39)     |
| 2: HES, ONS              | 127 (109, 148) | 128 (111, 149) | 130 (113, 150) | 103 (88, 120)  | 111 (96, 129)  | 87 (74, 102)   | 118 (91, 154)  |
| 3: CPRD, MINAP, HES      | 192 (170, 217) | 177 (157, 201) | 158 (139, 179) | 149 (131, 169) | 132 (117, 150) | 135 (119, 153) | 138 (109, 178) |
| 4: CPRD, MINAP, HES, ONS | 197 (175, 223) | 178 (158, 202) | 167 (148, 189) | 142 (125, 162) | 147 (130, 167) | 144 (128, 163) | 144 (113, 185) |

## 9. London

| Sources                  | 2003           | 2004           | 2005           | 2006           | 2007           | 2008           | 2009           |
|--------------------------|----------------|----------------|----------------|----------------|----------------|----------------|----------------|
| 1: CPRD                  | 220 (197, 247) | 188 (167, 212) | 187 (165, 213) | 171 (150, 195) | 164 (144, 186) | 142 (125, 161) | 136 (103, 179) |
| 1: HES                   | 157 (136, 182) | 163 (141, 187) | 136 (118, 158) | 152 (134, 174) | 144 (126, 165) | 137 (119, 157) | 141 (108, 186) |
| 1: MINAP                 | 92 (77, 111)   | 134 (114, 157) | 104 (88, 123)  | 130 (112, 151) | 110 (95, 129)  | 92 (79, 108)   | 103 (75, 142)  |
| 1: ONS                   | 48 (37, 62)    | 48 (37, 62)    | 49 (38, 64)    | 42 (32, 55)    | 42 (32, 56)    | 31 (24, 42)    | 49 (33, 76)    |
| 2: HES, ONS              | 184 (162, 210) | 184 (162, 209) | 177 (155, 202) | 179 (158, 203) | 162 (144, 184) | 134 (118, 153) | 149 (116, 193) |
| 3: CPRD, MINAP, HES      | 260 (234, 290) | 270 (242, 302) | 244 (218, 273) | 268 (241, 299) | 226 (204, 252) | 181 (162, 202) | 167 (131, 214) |
| 4: CPRD, MINAP, HES, ONS | 298 (268, 331) | 273 (244, 305) | 263 (237, 293) | 233 (209, 260) | 225 (203, 250) | 193 (173, 215) | 199 (160, 249) |

## 10. South East Coast

| Sources                  | 2003           | 2004           | 2005           | 2006           | 2007           | 2008           | 2009           |
|--------------------------|----------------|----------------|----------------|----------------|----------------|----------------|----------------|
| 1: CPRD                  | 193 (168, 221) | 176 (154, 203) | 174 (151, 202) | 160 (140, 184) | 144 (125, 165) | 128 (111, 147) | 119 (86, 164)  |
| 1: HES                   | 132 (113, 155) | 141 (122, 165) | 142 (122, 166) | 139 (120, 162) | 118 (101, 137) | 112 (96, 130)  | 118 (86, 163)  |
| 1: MINAP                 | 79 (65, 96)    | 94 (78, 114)   | 110 (93, 131)  | 114 (96, 135)  | 97 (81, 115)   | 90 (76, 107)   | 90 (65, 127)   |
| 1: ONS                   | 41 (31, 55)    | 40 (30, 53)    | 28 (20, 41)    | 37 (27, 50)    | 30 (22, 40)    | 43 (33, 57)    | 43 (26, 74)    |
| 2: HES, ONS              | 163 (141, 188) | 149 (129, 173) | 162 (142, 186) | 159 (138, 184) | 134 (117, 155) | 126 (109, 146) | 147 (113, 193) |
| 3: CPRD, MINAP, HES      | 250 (222, 282) | 243 (216, 273) | 210 (186, 237) | 194 (171, 219) | 188 (167, 213) | 165 (146, 187) | 189 (148, 242) |
| 4: CPRD, MINAP, HES, ONS | 255 (228, 286) | 223 (198, 251) | 207 (183, 235) | 215 (190, 243) | 190 (168, 214) | 188 (167, 212) | 234 (189, 291) |
