# Supplementary material
Source: PubMed Central journal article supplement (PMC4793448)
Supplement: here010061.wt5_default.pdf [file here010061.wt5_default.pdf]

**Supplementary Table 5** Recording of risk factors in primary care before myocardial infarction recorded only in primary care, hospital admission or disease registry sources from 1st January 2003 to 31st March 2009.

|                                                       | Primary care only (CPRD) | Hospital admissions only (HES) | Disease registry only (MINAP) |
|-------------------------------------------------------|--------------------------|--------------------------------|-------------------------------|
| Number of patients                                    | 4588                     | 2352                           | 1634                          |
| Age in years, median (IQR)                            | 76 (66-83)               | 78 (68-85)                     | 78 (69-84)                    |
| Sex, n female (%)                                     | 1912 (41.7)              | 1059 (45.0)                    | 712 (43.6)                    |
| Most deprived quintile*, n (%)                        | 996 (21.7)               | 426 (18.1)                     | 296 (18.1)                    |
| Smoking, n (%)                                        |                          |                                |                               |
| Current                                               | 960 (20.9)               | 429 (18.2)                     | 275 (16.8)                    |
| Ex                                                    | 2855 (62.2)              | 1440 (61.2)                    | 1081 (66.2)                   |
| Non                                                   | 585 (12.8)               | 339 (14.4)                     | 253 (15.5)                    |
| Missing                                               | 188 (4.1)                | 144 (6.1)                      | 25 (1.5)                      |
| Systolic blood pressure mmHg, mean (SD) †             | 145 (15.7)               | 147 (16.4)                     | 146 (15.4)                    |
| Missing, n (%)                                        | 107 (2.3)                | 64 (2.7)                       | 15 (0.9)                      |
| Use of blood pressure lowering drugs, n (%)           | 2958 (64.5)              | 1546 (65.7)                    | 1149 (70.3)                   |
| Total serum cholesterol mmol/L, mean (SD) †           | 5.3 (0.9)                | 5.3 (0.9)                      | 5.3 (0.9)                     |
| Missing, n (%)                                        | 1267 (27.6)              | 735 (31.3)                     | 371 (22.7)                    |
| HDL cholesterol mmol/L, mean (SD) †                   | 1.3 (0.3)                | 1.3 (0.3)                      | 1.4 (0.3)                     |
| Missing, n (%)                                        | 2000 (43.6)              | 1052 (44.7)                    | 643 (39.4)                    |
| Use of lipid lowering medications, n (%)              | 1866 (40.7)              | 888 (37.8)                     | 726 (44.4)                    |
| Framingham hard coronary disease risk score, n (%) ‡  |                          |                                |                               |
| <10%                                                  | 395 (8.6)                | 163 (6.9)                      | 141 (8.6)                     |
| 10-20%                                                | 1347 (29.4)              | 714 (30.4)                     | 511 (31.3)                    |
| >20%                                                  | 836 (18.2)               | 420 (17.9)                     | 335 (20.5)                    |
| Missing                                               | 2010 (43.8)              | 1055 (44.9)                    | 647 (39.6)                    |
| Diabetes, n (%)                                       | 959 (20.9)               | 485 (20.6)                     | 376 (23.0)                    |
| Charlson index, mean (SD)                             | 2.9 (1.8)                | 2.6 (1.7)                      | 2.7 (1.7)                     |
| Primary care consultation rate per year, median (IQR) | 4.3 (1.9-9.2)            | 4.3 (1.8-8.9)                  | 4.4 (2.0-9.3)                 |

Abbreviations: CPRD, Clinical Practice Research Datalink; HDL, high density lipoprotein; HES, Hospital Episode Statistics; IQR, inter-quartile range; MINAP, Myocardial Ischaemia National Audit Project; SD, standard deviation.

\* social deprivation was assessed by the index of multiple deprivation

† mean of measurements before the date of myocardial infarction

‡ based on patients with complete data for blood pressure and cholesterol
