# Supplementary material
Source: PubMed Central journal article supplement (PMC4793448)
Supplement: here010061.wt6_default.pdf [file here010061.wt6_default.pdf]

**Supplementary Table 6** Recording in primary care, hospital data, disease registry and death registry of myocardial infarction (MI) patients and records in other data sources within 30 days.

|                                                           | Non-fatal myocardial infarction     |                                             |                                           | Fatal myocardial infarction (death within 7 days) |                                        |                                          |                                             |
|-----------------------------------------------------------|-------------------------------------|---------------------------------------------|-------------------------------------------|---------------------------------------------------|----------------------------------------|------------------------------------------|---------------------------------------------|
|                                                           | Primary care<br>(CPRD,<br>N=13 380) | Hospital<br>admission<br>(HES,<br>N=12 189) | Disease<br>registry<br>(MINAP,<br>N=9438) | Primary care<br>(CPRD,<br>N=1914)                 | Hospital<br>admission<br>(HES, N=1255) | Disease<br>registry<br>(MINAP,<br>N=621) | Cause specific<br>mortality (ONS<br>N=2919) |
|                                                           | n (cum %)                           | n (cum %)                                   | n (cum %)                                 | n (cum %)                                         | n (cum %)                              | n (cum %)                                | n (cum %)                                   |
| <b>What was recorded in CPRD?</b>                         |                                     |                                             |                                           |                                                   |                                        |                                          |                                             |
| ST elevation MI                                           | <b>714(5.3)</b>                     | 666(5.5)                                    | 553(5.9)                                  | <b>10(0.5)</b>                                    | 7(0.6)                                 | 6(1.0)                                   | 7(0.2)                                      |
| Non ST elevation MI                                       | <b>2 650(25.1)</b>                  | 1 973(21.7)                                 | 1 337(20.0)                               | <b>9(1.0)</b>                                     | 6(1.0)                                 | 3(1.4)                                   | 7(0.5)                                      |
| MI, not otherwise specified                               | <b>10 016(100)</b>                  | 6 461(74.7)                                 | 4 776(70.6)                               | <b>1 895(100)</b>                                 | 470(38.5)                              | 223(37.4)                                | 1 617(55.9)                                 |
| Unstable angina or acute coronary syndrome                |                                     | 307(77.2)                                   | 402(74.9)                                 |                                                   | 7(39.0)                                | 4(38.0)                                  | 11(56.3)                                    |
| Other cardiac                                             |                                     | 1 119(86.4)                                 | 953(85.0)                                 |                                                   | 112(48.0)                              | 57(47.2)                                 | 192(62.8)                                   |
| Chest pain                                                |                                     | 333(89.1)                                   | 283(88.0)                                 |                                                   | 59(52.7)                               | 38(53.3)                                 | 71(65.3)                                    |
| <i>Evidence for contact with secondary care</i>           |                                     | 663(94.5)                                   | 597(94.3)                                 |                                                   | 307(77.1)                              | 151(77.6)                                | 439(80.3)                                   |
| <i>Transfer out of general practice</i>                   |                                     | 103(95.4)                                   | 65(95.0)                                  |                                                   | 268(98.5)                              | 129(98.4)                                | 538(98.7)                                   |
| <i>None of the above*</i>                                 |                                     | 564(100)                                    | 472(100)                                  |                                                   | 19(100)                                | 10(100)                                  | 37(100)                                     |
| <b>What was recorded in HES?</b>                          |                                     |                                             |                                           |                                                   |                                        |                                          |                                             |
| Primary diagnosis of MI (I21-I23) in 1st hospital episode | 9 096(68.0)                         | <b>12 189(100)</b>                          | 6 851(72.6)                               | 462(24.1)                                         | <b>1 255(100)</b>                      | 422(68.0)                                | 1 072(36.7)                                 |
| Primary diagnosis of MI (I21-I23) after 1st episode       | 624(72.6)                           |                                             | 511(78.0)                                 | 75(28.1)                                          |                                        | 30(72.8)                                 | 97(40.0)                                    |
| Unstable angina                                           | 652(77.5)                           |                                             | 651(84.9)                                 | 22(29.2)                                          |                                        | 10(74.4)                                 | 37(41.3)                                    |
| Other cardiac                                             | 983(84.9)                           |                                             | 780(93.2)                                 | 143(36.7)                                         |                                        | 51(82.6)                                 | 202(48.2)                                   |
| Chest pain                                                | 127(85.8)                           |                                             | 74(93.9)                                  | 10(37.2)                                          |                                        | 2(82.9)                                  | 16(48.8)                                    |
| <i>None of the above†</i>                                 | 1 898(100)                          |                                             | 571(100)                                  | 1 202(100)                                        |                                        | 106(100)                                 | 1 495(100)                                  |
| <b>What was recorded in MINAP?</b>                        |                                     |                                             |                                           |                                                   |                                        |                                          |                                             |
| ST elevation MI                                           | 3 409(25.5)                         | 3 458(28.4)                                 | <b>3 928(41.6)</b>                        | 151(7.9)                                          | 277(22.1)                              | <b>345(55.6)</b>                         | 304(10.4)                                   |
| Non ST elevation MI                                       | 3 306(50.2)                         | 3 445(56.6)                                 | <b>5 510(100)</b>                         | 78(12.0)                                          | 149(33.9)                              | <b>276(100)</b>                          | 194(17.1)                                   |
| Discharge diagnosis of unstable angina                    | 379(53.0)                           | 425(60.1)                                   |                                           | 14(12.7)                                          | 28(36.2)                               |                                          | 38(18.4)                                    |
| Admission diagnosis of acute coronary syndrome            | 121(53.9)                           | 140(61.3)                                   |                                           | 17(13.6)                                          | 26(38.2)                               |                                          | 37(19.6)                                    |
| <i>No record in MINAP</i>                                 | 6 165(100)                          | 4 721(100)                                  |                                           | 1 654(100)                                        | 775(100)                               |                                          | 2 346(100)                                  |
| <b>What was recorded in ONS?</b>                          |                                     |                                             |                                           |                                                   |                                        |                                          |                                             |
| MI (I21-I23) underlying                                   |                                     |                                             |                                           | 1 526(79.7)                                       | 1 073(85.5)                            | 495(79.7)                                | <b>2 919(100)</b>                           |
| MI (I21-I23) any other cause                              |                                     |                                             |                                           | 175(88.9)                                         | 71(91.2)                               | 50(87.8)                                 |                                             |
| Other coronary disease (I20-I25) underlying               |                                     |                                             |                                           | 110(94.6)                                         | 51(95.2)                               | 31(92.8)                                 |                                             |
| Other coronary disease (I20-I25) any other cause          |                                     |                                             |                                           | 24(95.9)                                          | 18(96.7)                               | 13(94.8)                                 |                                             |
| <i>None of the above</i>                                  |                                     |                                             |                                           | 79(100)                                           | 42(100)                                | 32(100)                                  |                                             |

\* For both HES and MINAP myocardial infarction patients, the most common CPRD Read codes if none of the listed codes were recorded included 'telephone encounter', 'home visit' and codes indicating blood pressure readings and blood tests (which are some of the most commonly codes used in the CPRD data source).

† For both CPRD and MINAP myocardial infarction patients, the most common ICD-10 codes if none of the listed codes were recorded included end-stage renal disease, hypertensive renal disease, and unknown/unspecified causes of morbidity.

Abbreviations: CPRD, Clinical Practice Research Datalink; HES, Hospital Episode Statistics; ICD-10, International Classification of Diseases, 10th revision; MI, myocardial infarction; MINAP, Myocardial Ischaemia National Audit Project; ONS, Office for National Statistics
