# Supplementary material
Source: PubMed Central journal article supplement (PMC4793448)
Supplement: here010061.wt7_default.pdf [file here010061.wt7_default.pdf]

**Supplementary Table 7** Recording of non-fatal CPRD myocardial infarction (MI) in HES and MINAP within 30 days by type of CPRD record; number (%). Total number of non-fatal CPRD MI = 13 380.

| Code or category                                | Number of patients | Record in HES             |                               |                              | Record in MINAP |                     |                 |
|-------------------------------------------------|--------------------|---------------------------|-------------------------------|------------------------------|-----------------|---------------------|-----------------|
|                                                 |                    | Primary MI, first episode | Primary MI, not first episode | Other coronary heart disease | ST elevation MI | Non ST elevation MI | Unstable angina |
| <b>CPRD source table</b>                        |                    |                           |                               |                              |                 |                     |                 |
| Clinical                                        | 13 341             | 9087 (68.1)               | 623 (4.7)                     | 1630 (12.2)                  | 3407 (25.5)     | 3302 (24.8)         | 377 (2.8)       |
| Referral                                        | 113                | 45 (39.8)                 | 3 (2.7)                       | 19 (16.8)                    | 28 (24.8)       | 8 (7.1)             | 4 (3.5)         |
| Test                                            | 24                 | 14 (58.3)                 | 2 (8.3)                       | 1 (4.2)                      | 6 (25)          | 3 (12.5)            | 0               |
| <b>Entity code</b>                              |                    |                           |                               |                              |                 |                     |                 |
| Medical history                                 | 12 983             | 8903 (68.6)               | 611 (4.7)                     | 1588 (12.2)                  | 3350 (25.8)     | 3227 (24.9)         | 370 (2.8)       |
| Coronary heart disease register                 | 6594               | 4684 (71.0)               | 284 (4.3)                     | 700 (10.6)                   | 2005 (30.4)     | 1501 (22.8)         | 180 (2.7)       |
| Cardiovascular or blood pressure consultation   | 4                  | 1 (25)                    | 0                             | 2 (50)                       | 1 (25)          | 1 (25)              | 0               |
| Well person concerns                            | 1                  | 0                         | 0                             | 0                            | 0               | 0                   | 0               |
| Cause of death                                  | 105                | 72 (68.6)                 | 2 (1.9)                       | 8 (7.6)                      | 10 (9.5)        | 28 (26.7)           | 2 (1.9)         |
| Serum cholesterol                               | 2                  | 2 (100)                   | 0                             | 0                            | 1 (50)          | 1 (50)              | 0               |
| ECG                                             | 22                 | 12 (54.5)                 | 2 (9.1)                       | 1 (4.5)                      | 5 (22.7)        | 2 (9.1)             | 0               |
| <b>Read terms in chapter 3 (investigations)</b> |                    |                           |                               |                              |                 |                     |                 |
| 323..00 ECG: myocardial infarction              | 31                 | 13 (41.9)                 | 2 (6.5)                       | 2 (6.5)                      | 6 (19.4)        | 2 (6.5)             | 0               |
| 3233.00 ECG: antero-septal infarct.             | 6                  | 1 (16.7)                  | 0                             | 0                            | 0               | 1 (16.7)            | 0               |
| 3234.00 ECG:posterior/inferior infarct          | 3                  | 2 (66.7)                  | 0                             | 0                            | 1 (33.3)        | 0                   | 0               |
| 3235.00 ECG: subendocardial infarct             | 1                  | 0                         | 0                             | 0                            | 0               | 0                   | 0               |
| 3236.00 ECG: lateral infarction                 | 1                  | 0                         | 0                             | 0                            | 0               | 0                   | 0               |
| 323Z.00 ECG: myocardial infarct NOS             | 1                  | 1 (100)                   | 0                             | 0                            | 0               | 0                   | 0               |

| Code or category                                                    | Number of patients | Record in HES             |                               |                              | Record in MINAP |                     |                 |
|---------------------------------------------------------------------|--------------------|---------------------------|-------------------------------|------------------------------|-----------------|---------------------|-----------------|
|                                                                     |                    | Primary MI, first episode | Primary MI, not first episode | Other coronary heart disease | ST elevation MI | Non ST elevation MI | Unstable angina |
| <b>Read term in chapter 8 (therapeutic procedures)</b>              |                    |                           |                               |                              |                 |                     |                 |
| 889A.00 Diab mellit insulin-glucose infus acute myocardial infarct  | 1                  | 0                         | 0                             | 0                            | 0               | 0                   | 0               |
| <b>Read terms in category G30 (myocardial infarction diagnosis)</b> |                    |                           |                               |                              |                 |                     |                 |
| G30..00 Acute myocardial infarction                                 | 5220               | 3458 (66.2)               | 241 (4.6)                     | 390 (7.5)                    | 1425 (27.3)     | 1120 (21.5)         | 169 (3.2)       |
| G30..11 Attack - heart                                              | 7                  | 2 (28.6)                  | 0                             | 1 (14.3)                     | 2 (28.6)        | 0                   | 0               |
| G30..12 Coronary thrombosis                                         | 5                  | 2 (40)                    | 0                             | 1 (20)                       | 1 (20)          | 2 (40)              | 0               |
| G30..14 Heart attack                                                | 74                 | 32 (43.2)                 | 8 (10.8)                      | 9 (12.2)                     | 13 (17.6)       | 14 (18.9)           | 0               |
| G30..15 MI - acute myocardial infarction                            | 3312               | 2166 (65.4)               | 124 (3.7)                     | 256 (7.7)                    | 920 (27.8)      | 726 (21.9)          | 99 (3)          |
| G30..16 Thrombosis - coronary                                       | 5                  | 3 (60)                    | 0                             | 1 (20)                       | 0               | 3 (60)              | 0               |
| G30..17 Silent myocardial infarction                                | 22                 | 2 (9.1)                   | 0                             | 3 (13.6)                     | 0               | 1 (4.5)             | 0               |
| G300.00 Acute anterolateral infarction                              | 58                 | 48 (82.8)                 | 2 (3.4)                       | 3 (5.2)                      | 29 (50)         | 4 (6.9)             | 1 (1.7)         |
| G301.00 Other specified anterior myocardial infarction              | 79                 | 50 (63.3)                 | 4 (5.1)                       | 4 (5.1)                      | 28 (35.4)       | 6 (7.6)             | 1 (1.3)         |
| G301000 Acute anteroapical infarction                               | 1                  | 0                         | 0                             | 1 (100)                      | 0               | 0                   | 0               |
| G301100 Acute anteroseptal infarction                               | 34                 | 28 (82.4)                 | 1 (2.9)                       | 1 (2.9)                      | 16 (47.1)       | 6 (17.6)            | 1 (2.9)         |
| G301z00 Anterior myocardial infarction NOS                          | 115                | 93 (80.9)                 | 2 (1.7)                       | 5 (4.3)                      | 67 (58.3)       | 11 (9.6)            | 3 (2.6)         |
| G302.00 Acute inferolateral infarction                              | 57                 | 45 (78.9)                 | 2 (3.5)                       | 2 (3.5)                      | 31 (54.4)       | 2 (3.5)             | 2 (3.5)         |
| G303.00 Acute inferoposterior infarction                            | 16                 | 13 (81.3)                 | 0                             | 1 (6.3)                      | 8 (50)          | 3 (18.8)            | 1 (6.3)         |
| G304.00 Posterior myocardial infarction NOS                         | 23                 | 14 (60.9)                 | 2 (8.7)                       | 2 (8.7)                      | 8 (34.8)        | 4 (17.4)            | 0               |
| G305.00 Lateral myocardial infarction NOS                           | 14                 | 8 (57.1)                  | 0                             | 2 (14.3)                     | 6 (42.9)        | 1 (7.1)             | 0               |
| G306.00 True posterior myocardial infarction                        | 3                  | 3 (100)                   | 0                             | 0                            | 1 (33.3)        | 1 (33.3)            | 0               |
| G307.00 Acute subendocardial infarction                             | 30                 | 22 (73.3)                 | 1 (3.3)                       | 0                            | 1 (3.3)         | 11 (36.7)           | 1 (3.3)         |

| Code or category                                                           | Record in HES      |                           |                               |                              | Record in MINAP   |                     |                 |
|----------------------------------------------------------------------------|--------------------|---------------------------|-------------------------------|------------------------------|-------------------|---------------------|-----------------|
|                                                                            | Number of patients | Primary MI, first episode | Primary MI, not first episode | Other coronary heart disease | ST elevation MI   | Non ST elevation MI | Unstable angina |
| G307000 Acute non-Q wave infarction                                        | 40                 | 25 (62.5)                 | 3 (7.5)                       | 3 (7.5)                      | 4 (10)            | 11 (27.5)           | 1 (2.5)         |
| <b><i>G307100 Acute non-ST segment elevation myocardial infarction</i></b> | <b>2653</b>        | <b>1908 (71.9)</b>        | <b>169 (6.4)</b>              | <b>180 (6.8)</b>             | <b>103 (3.9)</b>  | <b>1205 (45.4)</b>  | <b>65 (2.5)</b> |
| G308.00 Inferior myocardial infarction NOS                                 | 450                | 375 (83.3)                | 7 (1.6)                       | 15 (3.3)                     | 256 (56.9)        | 29 (6.4)            | 14 (3.1)        |
| G309.00 Acute Q-wave infarct                                               | 2                  | 0                         | 0                             | 1 (50)                       | 0                 | 0                   | 0               |
| G30A.00 Mural thrombosis                                                   | 17                 | 3 (17.6)                  | 0                             | 2 (11.8)                     | 0                 | 0                   | 0               |
| G30B.00 Acute posterolateral myocardial infarction                         | 3                  | 2 (66.7)                  | 0                             | 0                            | 2 (66.7)          | 0                   | 0               |
| G30X.00 Acute transmural myocardial infarction of unspecified site         | 2                  | 2 (100)                   | 0                             | 0                            | 2 (100)           | 0                   | 0               |
| <b><i>G30X000 Acute ST segment elevation myocardial infarction</i></b>     | <b>714</b>         | <b>616 (86.3)</b>         | <b>19 (2.7)</b>               | <b>43 (6)</b>                | <b>463 (64.8)</b> | <b>62 (8.7)</b>     | <b>6 (0.8)</b>  |
| G30y.00 Other acute myocardial infarction                                  | 9                  | 7 (77.8)                  | 0                             | 1 (11.1)                     | 2 (22.2)          | 2 (22.2)            | 0               |
| G30y000 Acute atrial infarction                                            | 2                  | 0                         | 0                             | 2 (100)                      | 0                 | 0                   | 0               |
| G30y100 Acute papillary muscle infarction                                  | 1                  | 0                         | 0                             | 0                            | 0                 | 0                   | 0               |
| G30y200 Acute septal infarction                                            | 8                  | 2 (25)                    | 1 (12.5)                      | 1 (12.5)                     | 3 (37.5)          | 0                   | 0               |
| G30yz00 Other acute myocardial infarction NOS                              | 7                  | 2 (28.6)                  | 0                             | 1 (14.3)                     | 0                 | 1 (14.3)            | 0               |
| G30z.00 Acute myocardial infarction NOS                                    | 754                | 500 (66.3)                | 49 (6.5)                      | 53 (7)                       | 162 (21.5)        | 183 (24.3)          | 26 (3.4)        |
| <b>Other terms in Read chapter G (cardiovascular diagnoses)</b>            |                    |                           |                               |                              |                   |                     |                 |
| G310.11 Dressler's syndrome                                                | 13                 | 0                         | 0                             | 6 (46.2)                     | 0                 | 0                   | 0               |
| G31y100 Microinfarction of heart                                           | 1                  | 0                         | 0                             | 0                            | 0                 | 0                   | 0               |
| G35..00 Subsequent myocardial infarction                                   | 7                  | 2 (28.6)                  | 0                             | 0                            | 1 (14.3)          | 2 (28.6)            | 0               |
| G350.00 Subsequent myocardial infarction of anterior wall                  | 1                  | 0                         | 0                             | 0                            | 0                 | 0                   | 0               |
| G351.00 Subsequent myocardial infarction of inferior wall                  | 4                  | 3 (75)                    | 0                             | 0                            | 3 (75)            | 0                   | 0               |

| Code or category                                                     | Number of patients | Record in HES             |                               |                              | Record in MINAP |                     |                 |
|----------------------------------------------------------------------|--------------------|---------------------------|-------------------------------|------------------------------|-----------------|---------------------|-----------------|
|                                                                      |                    | Primary MI, first episode | Primary MI, not first episode | Other coronary heart disease | ST elevation MI | Non ST elevation MI | Unstable angina |
| G353.00 Subsequent myocardial infarction of other sites              | 1                  | 1 (100)                   | 0                             | 0                            | 0               | 1 (100)             | 0               |
| G35X.00 Subsequent myocardial infarction of unspecified site         | 1                  | 0                         | 0                             | 0                            | 0               | 0                   | 0               |
| G36..00 Certain current complication follow acute myocardial infarct | 1                  | 1 (100)                   | 0                             | 0                            | 1 (100)         | 0                   | 0               |
| G361.00 Atrial septal defect/curr comp folow acut myocardal infarct  | 1                  | 0                         | 0                             | 1 (100)                      | 0               | 0                   | 0               |
| G362.00 Ventric septal defect/curr comp fol acut myocardal infarctn  | 1                  | 0                         | 0                             | 0                            | 0               | 0                   | 0               |
| G363.00 Ruptur cardiac wall w/out haemopericard/cur comp fol ac MI   | 1                  | 0                         | 0                             | 0                            | 0               | 0                   | 0               |
| G364.00 Ruptur chordae tendinae/curr comp fol acute myocard infarct  | 1                  | 0                         | 0                             | 0                            | 0               | 0                   | 0               |
| G365.00 Rupture papillary muscle/curr comp fol acute myocard infarct | 1                  | 0                         | 0                             | 0                            | 0               | 0                   | 0               |
| G366.00 Thrombosis atrium,auric append&vent/curr comp foll acute MI  | 1                  | 0                         | 0                             | 1 (100)                      | 1 (100)         | 0                   | 0               |
| G38..00 Postoperative myocardial infarction                          | 18                 | 1 (5.6)                   | 1 (5.6)                       | 4 (22.2)                     | 1 (5.6)         | 3 (16.7)            | 0               |
| G380.00 Postoperative transmural myocardial infarction anterior wall | 1                  | 0                         | 0                             | 0                            | 0               | 0                   | 0               |
| G381.00 Postoperative transmural myocardial infarction inferior wall | 1                  | 0                         | 0                             | 0                            | 0               | 0                   | 0               |
| G384.00 Postoperative subendocardial myocardial infarction           | 1                  | 1 (100)                   | 0                             | 0                            | 0               | 1 (100)             | 0               |
| G38z.00 Postoperative myocardial infarction, unspecified             | 2                  | 0                         | 0                             | 1 (50)                       | 0               | 0                   | 0               |
| G501.00 Post infarction pericarditis                                 | 2                  | 1 (50)                    | 0                             | 1 (50)                       | 1 (50)          | 0                   | 0               |
| Gyu3400 [X]Acute transmural myocardial infarction of unspecif site   | 1                  | 0                         | 0                             | 0                            | 0               | 0                   | 0               |

Abbreviations: CPRD, Clinical Practice Research Datalink; HES, Hospital Episode Statistics; MI, myocardial infarction; MINAP, Myocardial Ischaemia

## National Audit Project

Note: The total number of patients was 13 380. An individual patient may have more than one Read code entered on the date of their first CPRD myocardial infarction during the study period, and can therefore appear on more than one row. Agreement varied between specific Read terms used to identify MI in CPRD. Read terms stating MI with an anatomical location (e.g. 'Acute anterolateral infarction') were associated with a HES primary record of MI within 30 days in about 80% of cases, whereas for less specific terms stating 'acute myocardial infarction' the proportion was slightly lower, at 66%. Even fewer patients with Read terms stating 'heart attack' or 'coronary thrombosis' had a HES primary record of MI (43% and 40%, respectively). There was a similar pattern in the Read codes associated with MI in the MINAP disease registry.
