# Supplementary material
Source: PubMed Central journal article supplement (PMC4793448)
Supplement: here010061.wt8_default.pdf [file here010061.wt8_default.pdf]

**Supplementary Table 8** Recording of fatal and non-fatal MINAP myocardial infarction (MI) in HES and CPRD within 30 days by type of MINAP record; number (%). The total number of patients was 621 with fatal and and 9438 with non-fatal MINAP MI.

| Whether fatal<br>(died within 7<br>days) | MI record<br>in MINAP | Number<br>of<br>patients | Record in CPRD |             |                         |                                 | Record in HES                |                                  |                                    |
|------------------------------------------|-----------------------|--------------------------|----------------|-------------|-------------------------|---------------------------------|------------------------------|----------------------------------|------------------------------------|
|                                          |                       |                          | STEMI          | NSTEMI      | MI, type<br>unspecified | Other coronary<br>heart disease | Primary MI, first<br>episode | Primary MI, not<br>first episode | Other<br>coronary<br>heart disease |
| <b>Non-fatal</b>                         | <b>STEMI</b>          | 4026                     | 487 (12.1)     | 105 (2.6)   | 2796 (69.4)             | 243 (6.0)                       | 3441 (85.5)                  | 91 (2.3)                         | 274 (6.8)                          |
|                                          | <b>NSTEMI</b>         | 5530                     | 66 (1.2)       | 1232 (22.3) | 1980 (35.8)             | 1113 (20.1)                     | 3410 (61.7)                  | 420 (7.6)                        | 1157 (20.9)                        |
| <b>Fatal</b>                             | <b>STEMI</b>          | 347                      | 5 (1.4)        | 0 (0)       | 146 (42.1)              | 23 (6.6)                        | 273 (78.7)                   | 5 (1.4)                          | 3 (0.9)                            |
|                                          | <b>NSTEMI</b>         | 277                      | 1 (0.4)        | 3 (1.1)     | 77 (27.8)               | 39 (13.7)                       | 149 (53.8)                   | 25 (9.0)                         | 7 (2.5)                            |

Abbreviations: CPRD, Clinical Practice Research Datalink; HES, Hospital Episode Statistics; MI, myocardial infarction; MINAP, Myocardial Ischaemia National Audit Project; NSTEMI, non ST elevation myocardial infarction; STEMI, ST elevation myocardial infarction
