# Supplementary material
Source: PubMed Central journal article supplement (PMC4793448)
Supplement: here010061.wt9_default.pdf [file here010061.wt9_default.pdf]

**Supplementary Table 9** Recording of fatal and non-fatal HES myocardial infarction (MI) in CPRD and MINAP within 30 days by ICD-10 code used in HES; number of patients (%). The total number of patients was 12 189 (non-fatal) and 1255 (fatal).

| Whether fatal<br>(died within 7<br>days) | ICD-10 code used to<br>record MI in HES                              | Number<br>of<br>patients | Record in CPRD     |                        |                         |                                    | Record in MINAP    |                        |                    |
|------------------------------------------|----------------------------------------------------------------------|--------------------------|--------------------|------------------------|-------------------------|------------------------------------|--------------------|------------------------|--------------------|
|                                          |                                                                      |                          | ST elevation<br>MI | Non ST<br>elevation MI | MI, type<br>unspecified | Other<br>coronary<br>heart disease | ST elevation<br>MI | Non ST<br>elevation MI | Unstable<br>angina |
| <b>Non-fatal</b>                         | <b>I21</b> Acute myocardial<br>infarction                            | 10906                    | 611 (5.6)          | 1739 (15.9)            | 5891 (54)               | 1231 (11.3)                        | 3221 (29.5)        | 3016 (27.7)            | 369 (3.4)          |
|                                          | <b>I22</b> Subsequent<br>myocardial infarction                       | 1270                     | 54 (4.3)           | 233 (18.3)             | 567 (44.6)              | 192 (15.1)                         | 235 (18.5)         | 428 (33.7)             | 56 (4.4)           |
|                                          | <b>I23</b> Complications<br>following acute<br>myocardial infarction | 13                       | 1 (7.7)            | 1 (7.7)                | 3 (23.1)                | 3 (23.1)                           | 2 (15.4)           | 1 (7.7)                | 0                  |
| <b>Fatal</b>                             | <b>I21</b> Acute myocardial<br>infarction                            | 1102                     | 7 (0.6)            | 5 (0.5)                | 403 (36.6)              | 100 (9.1)                          | 254 (23)           | 129 (11.7)             | 21 (1.9)           |
|                                          | <b>I22</b> Subsequent<br>myocardial infarction                       | 149                      | 0                  | 1 (0.7)                | 67 (45.0)               | 19 (12.8)                          | 23 (15.4)          | 19 (12.8)              | 7 (4.7)            |
|                                          | <b>I23</b> Complications<br>following acute<br>myocardial infarction | 4                        | 0                  | 0                      | 0                       | 0                                  | 0                  | 1 (25)                 | 0                  |

Abbreviations: CPRD, Clinical Practice Research Datalink; HES, Hospital Episode Statistics; MI, myocardial infarction; MINAP, Myocardial Ischaemia National Audit Project
