# Supplementary material
Source: PubMed Central journal article supplement (PMC4793448)
Supplement: here010061.wt10_default.pdf [file here010061.wt10_default.pdf]

**Supplementary Table 10** Logistic regression analysis for factors associated with the outcome of recording in more than one data source for patients with non-fatal myocardial infarction.

|                                                                    | <b>CPRD and HES or<br/>MINAP vs. CPRD<br/>alone ‡</b> | <b>HES and CPRD or<br/>MINAP vs. HES<br/>alone ‡</b> | <b>MINAP and CPRD or<br/>HES vs. MINAP<br/>alone ‡</b> |
|--------------------------------------------------------------------|-------------------------------------------------------|------------------------------------------------------|--------------------------------------------------------|
| <b>Age group</b>                                                   |                                                       |                                                      |                                                        |
| <65                                                                | 1 (reference)                                         | 1 (reference)                                        | 1 (reference)                                          |
| 65-74                                                              | 0.71 (0.63-0.79) ***                                  | 0.74 (0.64-0.87) ***                                 | 0.50 (0.43-0.60) ***                                   |
| 75+                                                                | 0.72 (0.65-0.79) ***                                  | 0.58 (0.51-0.66) ***                                 | 0.39 (0.34-0.46) ***                                   |
| <b>Sex</b>                                                         |                                                       |                                                      |                                                        |
| Male                                                               | 1 (reference)                                         | 1 (reference)                                        | 1 (reference)                                          |
| Female                                                             | 0.87 (0.80-0.95) **                                   | 0.83 (0.74-0.92) ***                                 | 0.83 (0.74-0.93) **                                    |
| <b>Social deprivation<br/>quintile</b>                             |                                                       |                                                      |                                                        |
| 1 (most deprived)                                                  | 1 (reference)                                         | 1 (reference)                                        | 1 (reference)                                          |
| 2                                                                  | 1.11 (0.98-1.26)                                      | 1.05 (0.89-1.23)                                     | 1.08 (0.90-1.29)                                       |
| 3                                                                  | 1.05 (0.93-1.20)                                      | 1.02 (0.86-1.20)                                     | 1.07 (0.90-1.29)                                       |
| 4                                                                  | 1.07 (0.94-1.22)                                      | 0.89 (0.76-1.04)                                     | 0.90 (0.75-1.07)                                       |
| 5 (least deprived)                                                 | 0.97 (0.85-1.10)                                      | 1.03 (0.87-1.21)                                     | 1.13 (0.94-1.36)                                       |
| <b>Primary care<br/>consultation rate per<br/>year<sup>α</sup></b> | 0.85 (0.82-0.88) ***                                  | 0.85 (0.82-0.89) ***                                 | 0.85 (0.80-0.89) ***                                   |
| <b>Mortality at 30 days<sup>β</sup></b>                            | 2.24 (1.64-3.05) ***                                  | 0.32 (0.27-0.38) ***                                 | 0.41 (0.33-0.50) ***                                   |
| <b>Calendar year, per one<br/>year increase</b>                    | 1.16 (1.14-1.19) ***                                  | 1.11 (1.08-1.14) ***                                 | 1.01 (0.98-1.04)                                       |

Abbreviations: CPRD, Clinical Practice Research Datalink; HES, Hospital Episode Statistics; MINAP, Myocardial Ischaemia National Audit Project

Significance level: \* P < 0.05, \*\* P < 0.01, \*\*\* P < 0.001

<sup>α</sup> for an increase of 10 consultations per year

<sup>β</sup> based on mortality data from the Office for National Statistics (death registry)

‡ outcome: an odds ratio above 1 indicates that the risk factor is associated with higher odds of the myocardial infarction being captured in more than one data source; an odds ratio below 1 indicates that the risk factor is associated with lower odds of the myocardial infarction being captured in more than one data source.
